# Supplementary material for: Copper(i) clusters with bulky dithiocarboxylate, thiolate, and selenolate ligands
Source: Royal Society of Chemistry journal article supplement (doi:10.1039/c6dt02709a), 2016-01-01
Supplement: c6dt02709a1.pdf [file c6dt02709a1.pdf]

## Supporting Information for

### Copper(I) Clusters with Bulky Dithiocarboxylate, Thiolate, and Selenolate Ligands

Pokpong Rungthanaphatsophon, Charles L. Barnes, and Justin R. Walensky\*

Department of Chemistry, University of Missouri, Columbia, MO 65211

|                                           |   |
|-------------------------------------------|---|
| Thermal ellipsoid plot of <b>5</b> .....  | 1 |
| Thermal ellipsoid plot of <b>7</b> .....  | 2 |
| Thermal ellipsoid plot of <b>11</b> ..... | 2 |
| Thermal ellipsoid plot of <b>12</b> ..... | 3 |

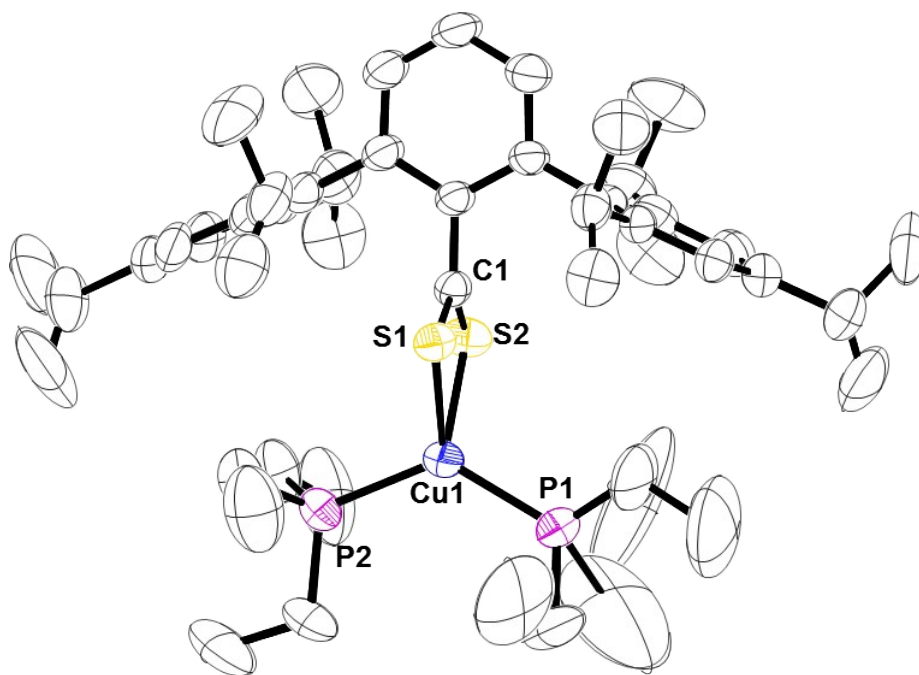

**Figure S1.** Thermal ellipsoid plot of **5** shown at the 30% probability level. All hydrogen atoms are omitted for clarity. Selected bond lengths: C1-S1: 1.65864(3) Å; C1-S2: 1.67355(3) Å; Cu1-S1: 2.44188(3) Å; Cu1-S2: 2.43358(3) Å; Cu1-P1: 2.2175(10) Å; Cu1-P2: 2.2361(10) Å;

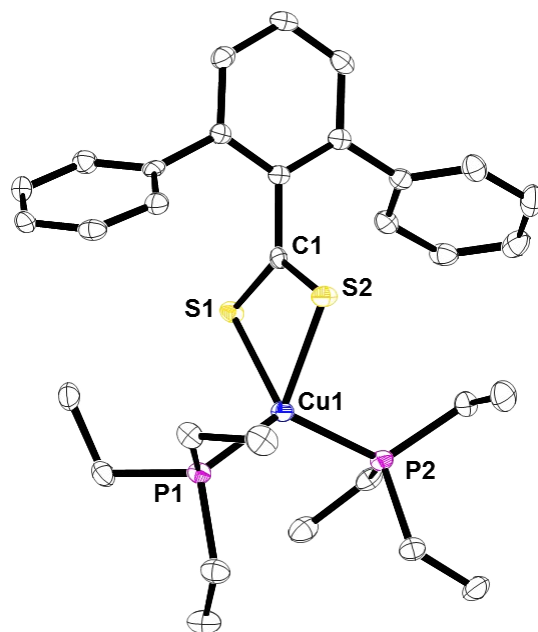

**Figure S2.** Thermal ellipsoid plot of **7** shown at the 50% probability level. All hydrogen atoms are omitted for clarity. Selected bond length C1-S1: 1.68312(8) Å; C1-S2: 1.6780(1) Å; Cu1-S1: 2.45045(11) Å; Cu1-S2: 2.42886(12) Å; Cu1-P1: 2.2316(6) Å; Cu1-P2: 2.2335(6) Å; P1-Cu1-P2: 125.81(2)°; S1-Cu1-S2: 73.25(2)°; S1-Cu1-P1: 115.10(2)°; S2-Cu1-P2: 105.33(2)°.

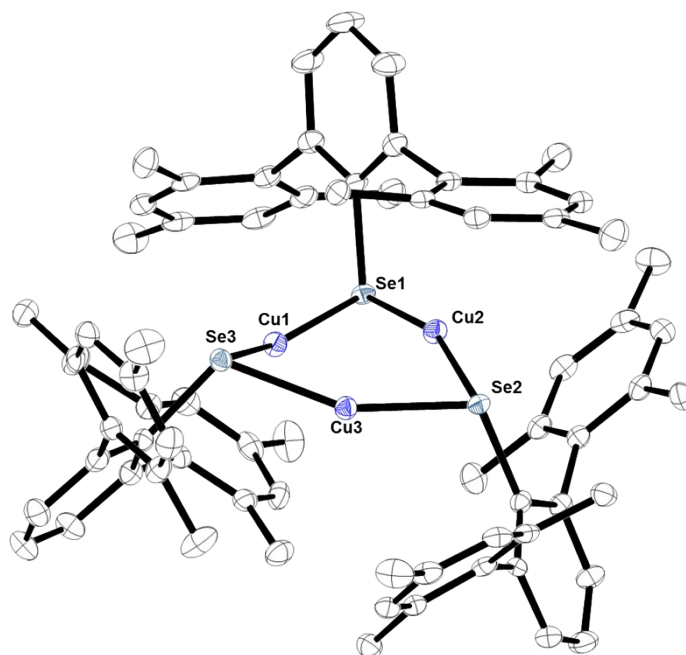

**Figure S3.** Thermal ellipsoid plot of **11** shown at the 50% probability level. All hydrogen atoms are omitted for clarity. Selected bond lengths and angles: Cu1-Se1: 2.3154(5) Å; Cu2-Se1: 2.3176(5) Å; Cu1-Se3: 2.3113(5) Å; Cu3-Se3: 2.3190(6) Å; Cu3-Se2: 2.3190(6) Å; Cu2-Se2:

2.3334(5) Å; Cu1-Cu2: 2.7946(8) Å; Cu2-Cu3: 2.6769(7) Å; Cu1-Cu3: 2.6537(5) Å; Se1-Cu1-Se3: 154.501(6)°; Se2-Cu3-Se3: 157.013(8)°; Se1-Cu2-Se2: 160.8907(19)°.

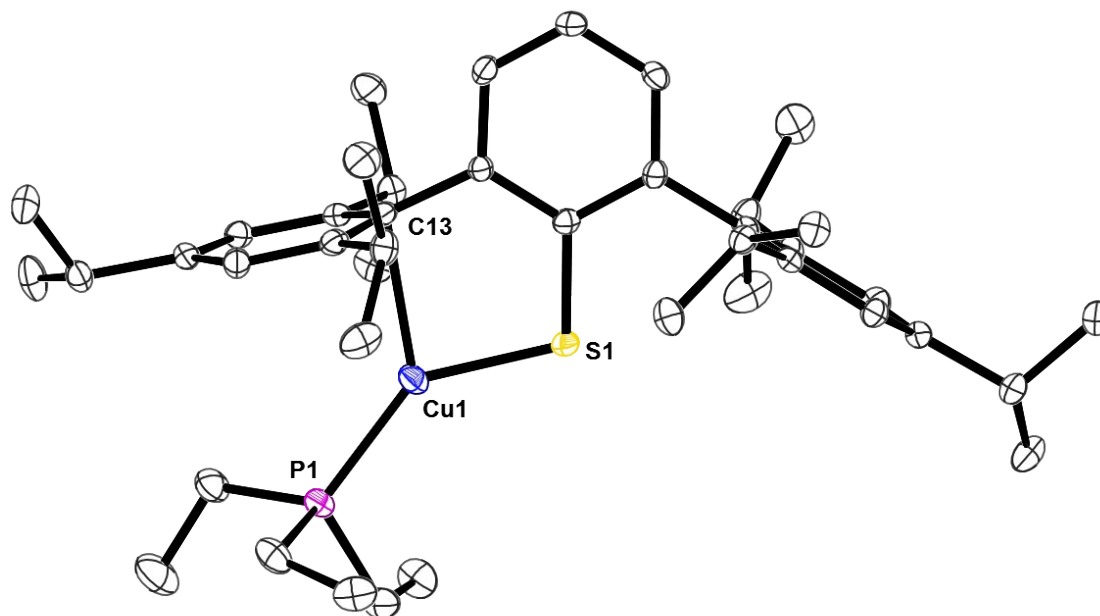

**Figure S4.** Thermal ellipsoid plot of **12** shown at the 50% probability level. All hydrogen atoms are omitted for clarity. Selected bond distances: Cu1-S1: 2.1734(10) Å; Cu1-C13: 2.378(3) Å; Cu1-P1: 2.1882(10) Å; S1-Cu1-C13: 87.03(8)°; C1-S1-Cu1: 103.53(7)°.
